# Supplementary material
Source: publisher site journal article supplement (https://www.spandidos-publications.com/1955/downloadSupplementary)

Figure S1. Transfection efficiency of miR-1236-3p mimic and inhibitor. Expression levels of miR-1236-3p following the transfection of Y79 cells with (A) miR-1236-3p mimic or miR-NC mimic and (B) miR-1236-3p inhibitor or miR-NC inhibitor were determined using reverse transcription-quantitative PCR. \*P<0.05, \*\*P<0.01 vs. miR-NC mimic/inhibitor group. miR, microRNA; NC, negative control.

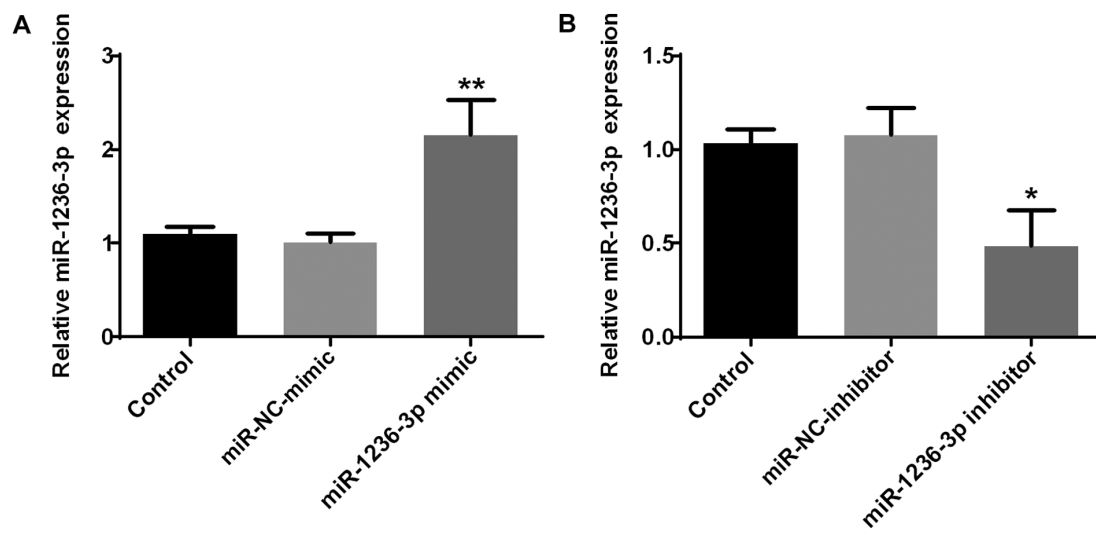

Supplement: Supplementary file 1 [file downloadSupplementary]
